# Supplementary material for: Evaluation of inactivated Bordetella pertussis as a delivery system for the immunization of mice with Pneumococcal Surface Antigen A
Source: PubMed Central journal article supplement (PMC6964896; doi:10.1371/journal.pone.0228055), 2020-01-16

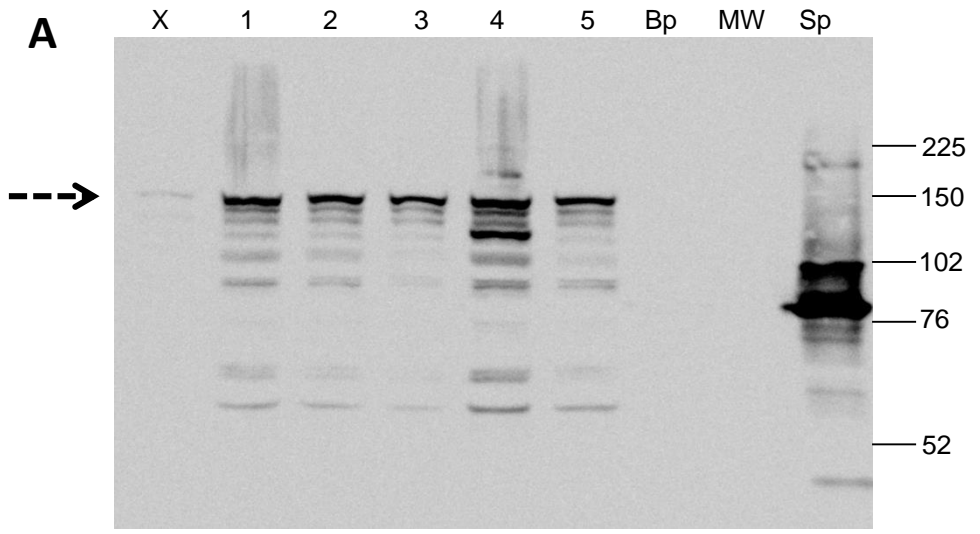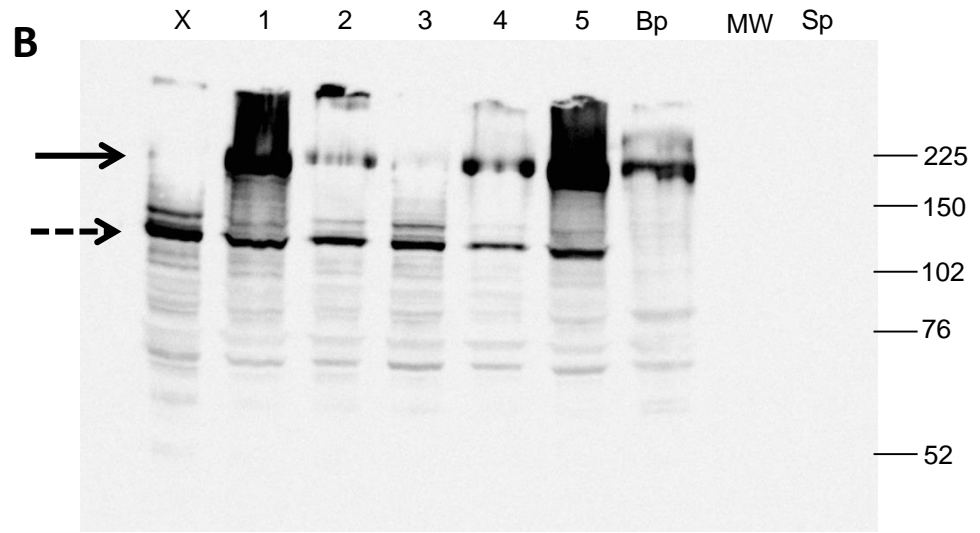

Supplement: pone.0228055.s003.pdf [file pone.0228055.s003.pdf]
