# Supplementary material for: Evaluation of inactivated Bordetella pertussis as a delivery system for the immunization of mice with Pneumococcal Surface Antigen A
Source: PubMed Central journal article supplement (PMC6964896; doi:10.1371/journal.pone.0228055), 2020-01-16
Supplement: pone.0228055.s005.pdf [file pone.0228055.s005.pdf]

X X 50 25 12.5 Bp 1.1 2.2 Mw X

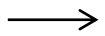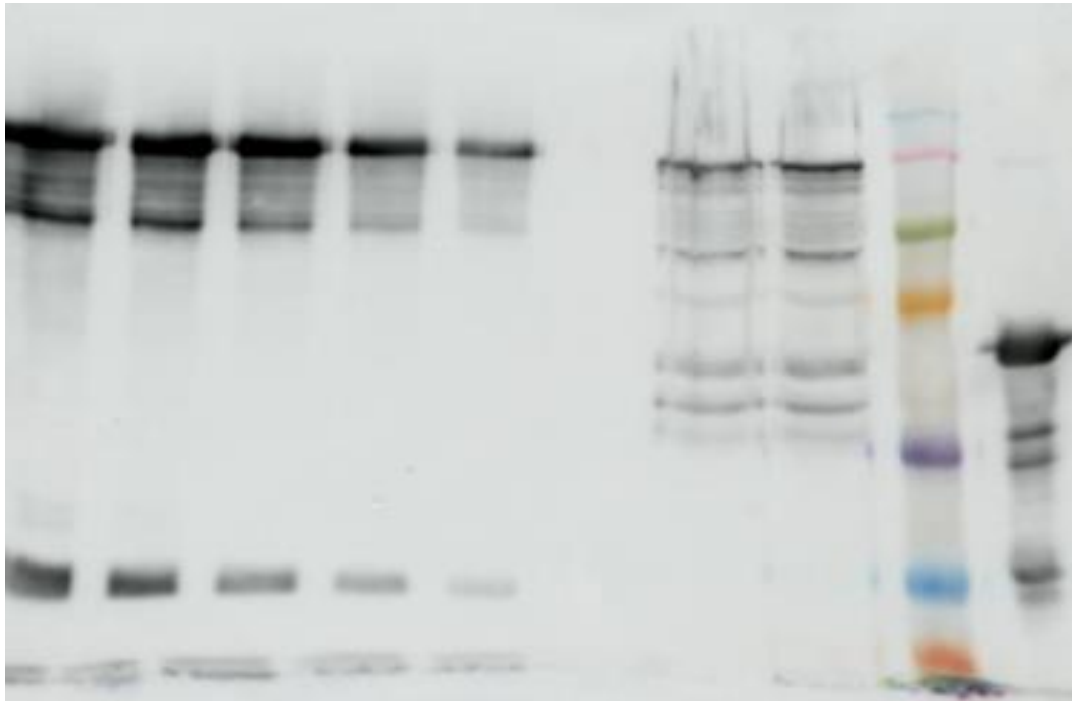

225  
150  
102  
76  
52  
38
